# Supplementary material for: The effect of regular consumption of lupin-containing foods on glycaemic control and blood pressure in people with type 2 diabetes mellitus
Source: Royal Society of Chemistry journal article supplement (doi:10.1039/c9fo01778j), 2019-12-16

**Supplementary Figure 1:** Individual weight before (Pre) and after (Post) regular consumption of lupin enriched food or energy matched control food for 8 weeks. Means and standard deviations.

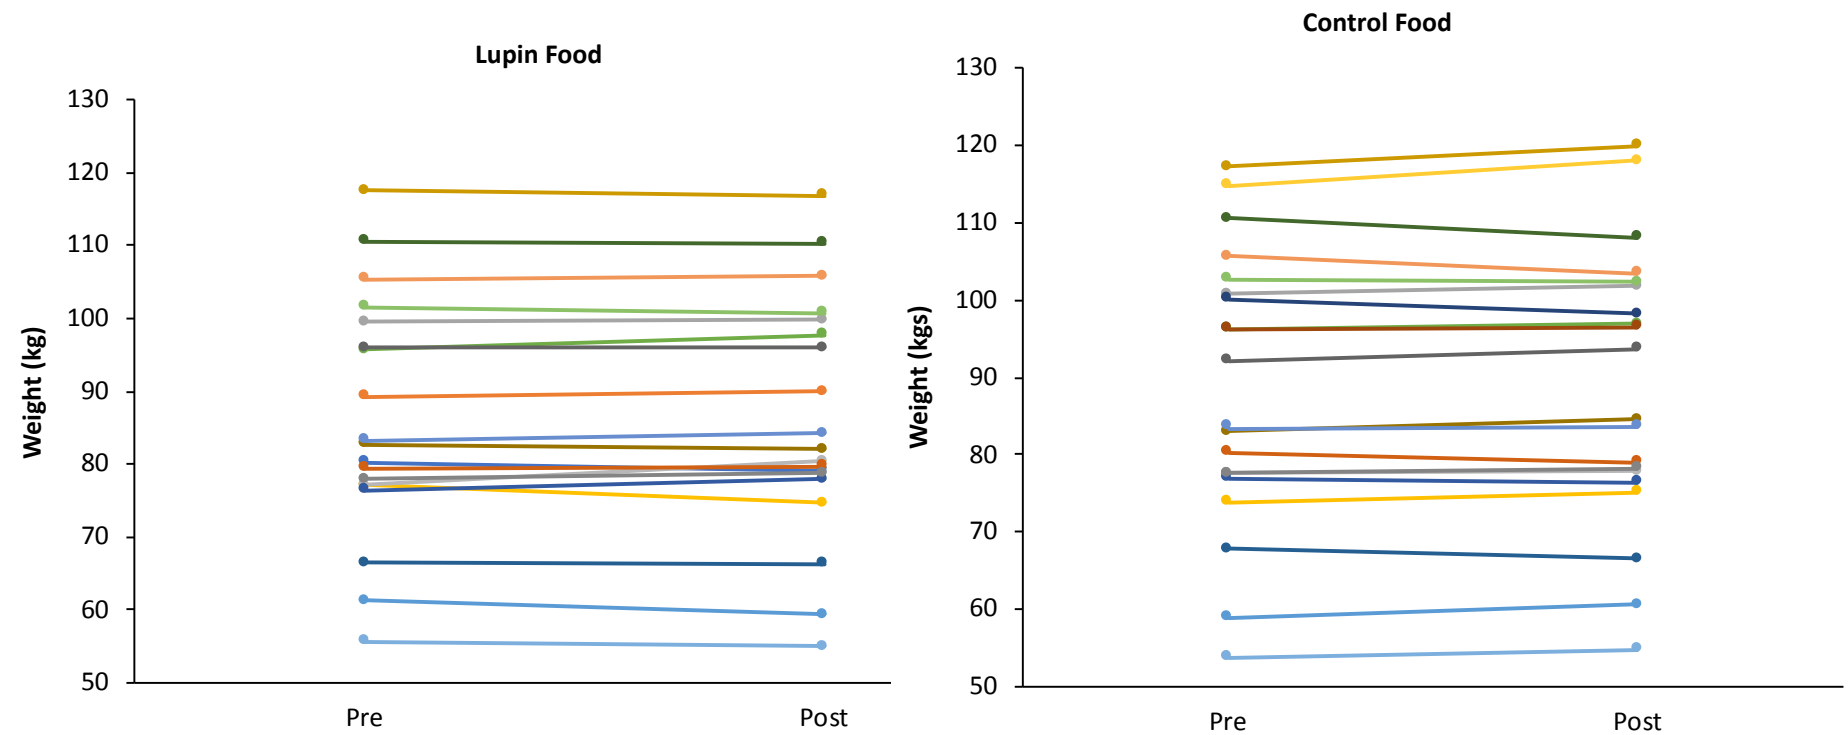

Supplement: c9fo01778j1.pdf [file c9fo01778j1.pdf]
